# Supplementary material for: Visual detection of Maize chlorotic mottle virus using unmodified gold nanoparticles
Source: Royal Society of Chemistry journal article supplement (doi:10.1039/c5ra16326a), 2015-01-01
Supplement: c5ra16326a1.pdf [file c5ra16326a1.pdf]

Species-specific sequence to MCMV

AGGTAATCTGCGGCAACAGACCCCAACGCGTTAGACACGACCTTACAGTTGACTCACGTCTTGCATCCTGT  
GAGAGCTCTAACGTGGGAATTTGCCCTGACTGGCAATCAGGTTTCATGCCCTCTCCCTGCACTTATGGCG  
ACCCTACCTTCAATTCACGCATTTTGAAGCTGTGGTGGCCGACGTTCTCGGAGGAACGGAAGATGACGG  
TGGTCCAAGCCTTGAGGAATGGTTTGACGCGCAAACCTTTTCAGATTACACAAATTGCGCAACAGATCCTC  
CGATGGCCACCGTACATACGCGAGAGAATGACATCAAGTCTTGGACAGAGCTTAGTGAAAACCTTCCAGA  
CCTTGTTAGGTATCCGGAAAGCCTTGTCGAGACTCTGCTTGACACGGAACATGAATGTGGACATTTTACG  
ATGCTCCTGATTCCTTTCAAATTTCTGTCACAGCTATGTTACAGATCGTTGCAAGTGCCAATCATGTGATC  
CAAACCTTCAGGCACGGTCTCTCTCGCGGGCTCTGCTTGGCCCGTTGCCGGAATCCGGAGACGATGCGGA  
GTGGATGGAGCAAGCATACACTCCAGATGCAGAA
